# Supplementary material
Source: publisher figshare collection journal article supplement (https://rs.figshare.com/ndownloader/files/17842658)
Supplement: Supplementary file 1 [file 17842658]

10	0.01	0.01	1	-1	0.03	0.04	0.4	0	5	1	105.59	0.07841
10	0.01	0.01	1	-1	0.03	0.04	0.4	0.1	5	1	104.15	0.07612
10	0.9	0.6	1	-1	0.03	0.04	0.4	0.2	5	1	127.24	0.09498
10	0.9	0.9	1	-1	0.03	0.04	0.4	0.3	5	1	176.94	0.08773
10	0.9	0.99	1	-1	0.03	0.04	0.4	0.4	5	1	310.35	0.08057
10	0.9	0.99	1	-1	0.03	0.04	0.4	0.5	5	1	299.31	0.07613
10	0.99	0.99	1	-1	0.03	0.04	0.4	0.6	5	1	1580.1	0.08124
10	0.99	0.99	1	-1	0.03	0.04	0.4	0.7	5	1	1580.7	0.0844
10	0.99	0.99	1	-1	0.03	0.04	0.4	0.8	5	1	1586.4	0.08287
10	0.99	0.99	1	-1	0.03	0.04	0.4	0.9	5	1	1575.4	0.08206
